# Supplementary material for: Supramolecular Porphyrin Nanostructures Based on Coordination-Driven Self-Assembly and Their Visible Light Catalytic Degradation of Methylene Blue Dye
Source: MDPI journal article supplement (doi:10.3390/nano10112314), 2020-11-22
Supplement: s1 [file s1]

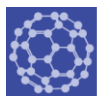

## Supplementary Materials

# Supramolecular Porphyrin Nanostructures Based on Coordination-Driven Self-Assembly and Their Visible Light Catalytic Degradation of Methylene Blue Dye

Nirmal Kumar Shee, Min Kyoung Kim and Hee-Joon Kim \*

Department of Applied Chemistry, Kumoh National Institute of Technology, Gumi 39177, Korea; nirmalshee@gmail.com (N.K.S.); min1107min@naver.com (M.K.K.)

\* Correspondence: hjk@kumoh.ac.kr; Tel.: +82-(54)-4787822

### List of contents:

**Figure S1.**  $^1\text{H}$  NMR spectrum of *meso*-5-(4-hydroxyphenyl)-10,15,20-tris(3,5-di-*tert*-butylphenyl)porphyrin in  $\text{CDCl}_3$ .

**Figure S2.**  $^1\text{H}$  NMR spectrum of *meso*-(5-(4-hydroxyphenyl)-10,15,20-tris(3,5-di-*tert*-butylphenyl)porphyrinato) zinc(II) in  $\text{CDCl}_3$ .

**Figure S3.**  $^1\text{H}$  NMR spectrum of 5,15-bis(3-pyridyl)-10,20-bis(phenyl)porphyrin in  $\text{CDCl}_3$ .

**Figure S4.**  $^1\text{H}$  NMR spectrum of *trans*-dihydroxo-(5,10,15,20-tetrakis(3-pyridyl)porphyrinato) tin(IV) in  $\text{CDCl}_3$ .

**Figure S5.**  $^1\text{H}$  NMR spectrum of triad **1** in  $\text{CDCl}_3$ .

**Figure S6.**  $^1\text{H}$  NMR spectrum of triad **2** in  $\text{CDCl}_3$ .

**Figure S7.**  $^1\text{H}$  NMR spectrum of triad **3** in  $\text{CDCl}_3$ .

**Figure S8.**  $^1\text{H}$  NMR spectrum of triad **4** (2 mM) in  $\text{CDCl}_3$ .

**Figure S9.** ESI-MS spectrum of triad **1**.

**Figure S10.** ESI-MS spectrum of triad **2**.

**Figure S11.** ESI-MS spectrum of triad **3**.

**Figure S12.** ESI-MS spectrum of triad **4**.

**Figure S13.** SEM images for the aggregates of triads: (a) **1**; (b) **2**; (c) **3**; (d) **4**.

**Figure S14.** Particle analyzing data for triad **2** in a *n*-hexane solution.

**Figure S15.** SEM images of the aggregates of the monomers: (a)  $\text{ZnL}^1$ ; (b)  $\text{SnL}^2$ .

**Figure S16.** Absorption spectral changes of triad **4** upon the addition of pyrrolidine in  $\text{CHCl}_3$ .

**Figure S17.** Fluorescence intensity changes of triad **4** upon the addition of pyrrolidine in  $\text{CHCl}_3$ .

**Figure S18.** SEM image for the aggregates of triad **4** upon the addition of pyrrolidine.

**Figure S19.** Absorption spectra of MB in presence of nano fibers derived from triad **4** under visible light irradiation.

**Figure S20.** Kinetics for the photocatalytic degradation of MB under visible light irradiation of the four triads (**1**, **2**, **3**, and **4**).

**Figure S21.** PXRD data of triad **4** before and after an experiment on the photo-degradation of MB.

**Figure S22.** Catalytic cycles using triad **4** as a photocatalyst for the degradation of MB.

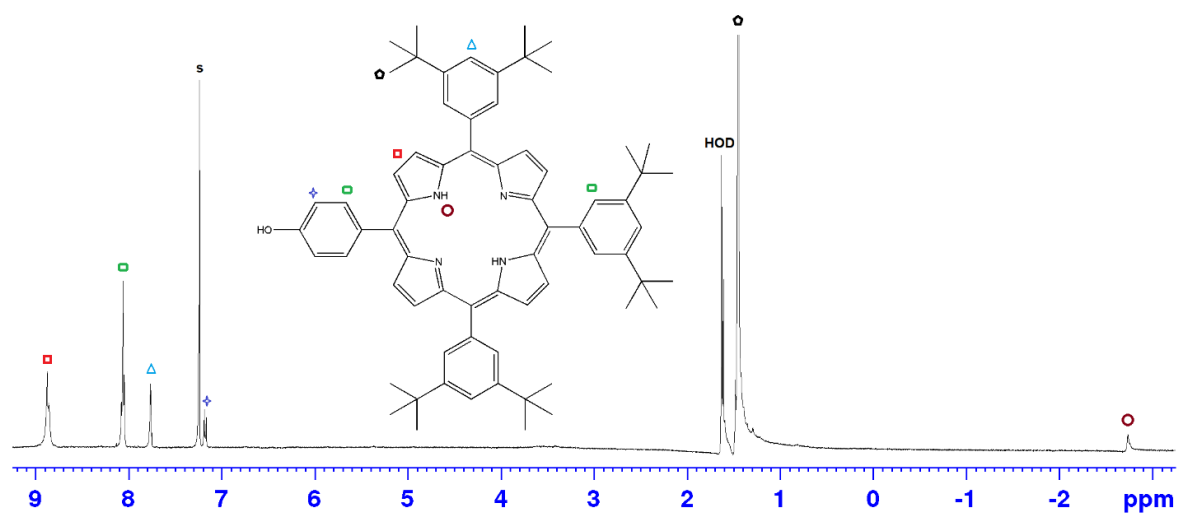

**Figure S1.**  $^1\text{H}$  NMR spectrum of *meso*-5-(4-hydroxyphenyl)-10,15,20-tris(3,5-di-*tert*-butylphenyl)porphyrin in  $\text{CDCl}_3$ .

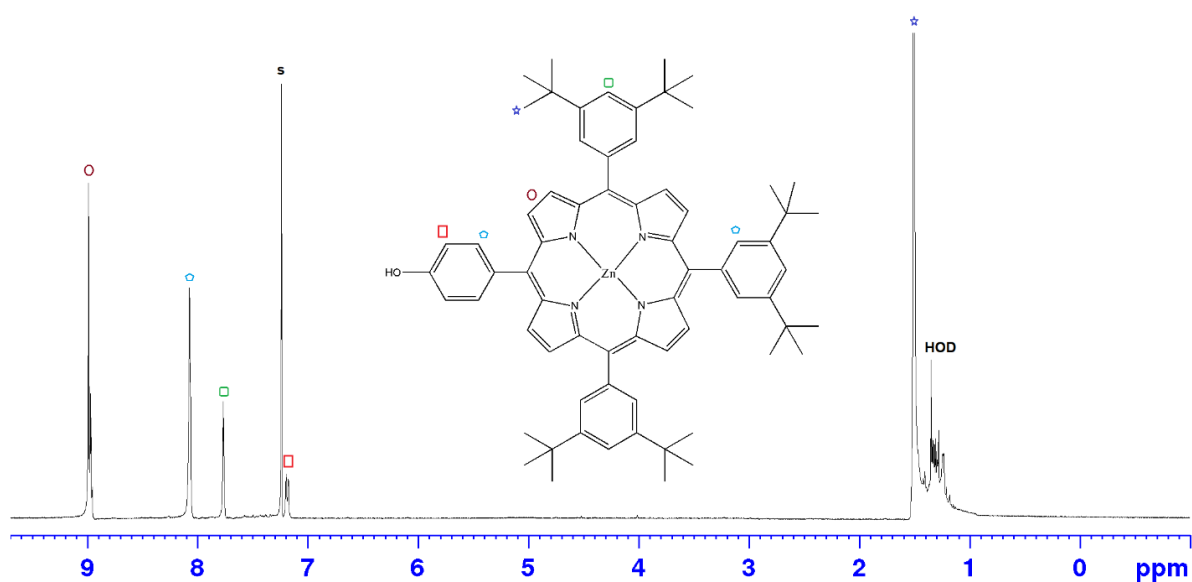

**Figure S2.**  $^1\text{H}$  NMR spectrum of *meso*-(5-(4-hydroxyphenyl)-10,15,20-tris(3,5-di-*tert*-butylphenyl)porphyrinato) zinc(II) in  $\text{CDCl}_3$ .

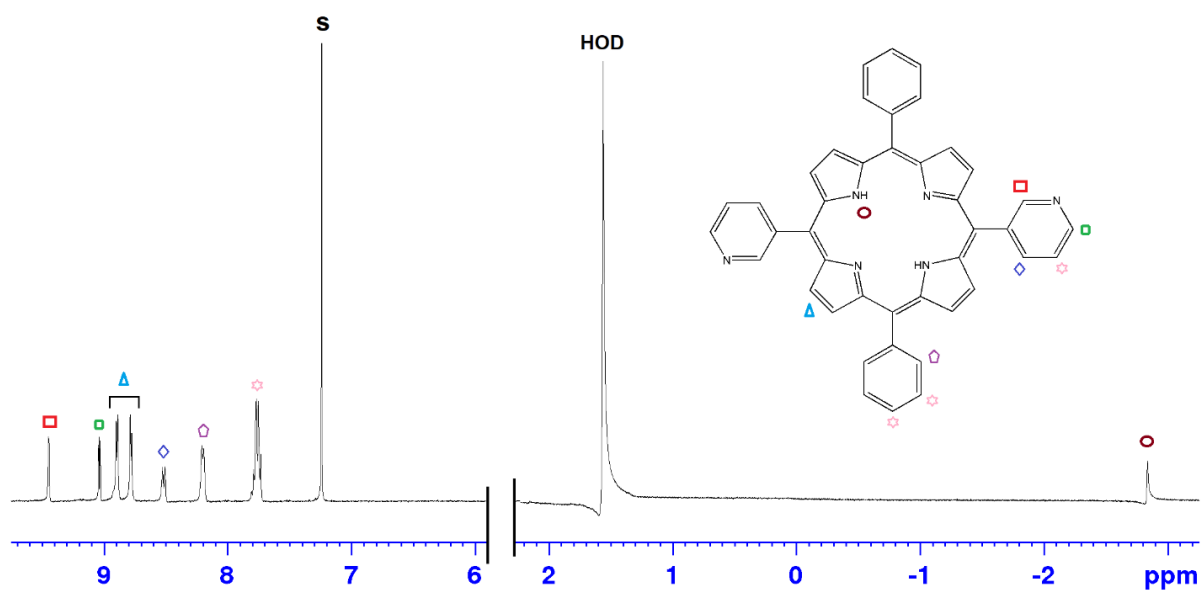

**Figure S3.**  $^1\text{H}$  NMR spectrum of 5,15-bis(3-pyridyl)-10,20-bis(phenyl)porphyrin in  $\text{CDCl}_3$ .

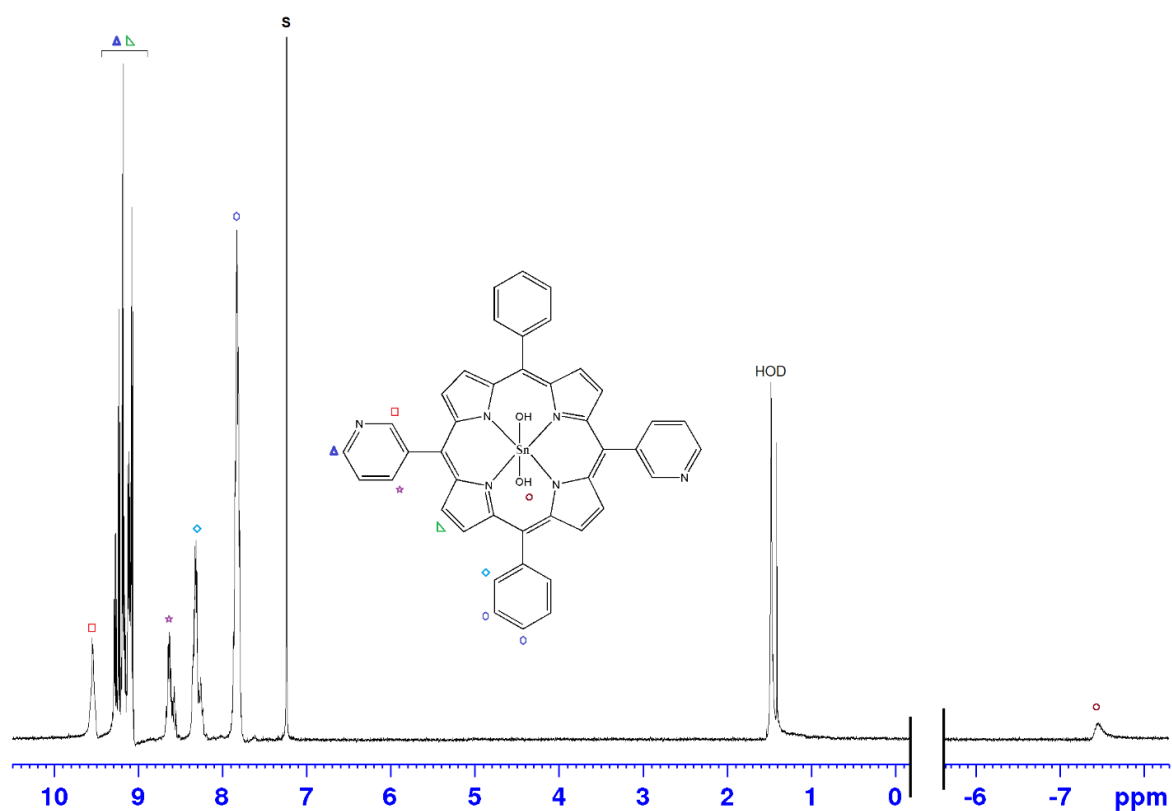

**Figure S4.**  $^1\text{H}$  NMR spectrum of *trans*-dihydroxo-(5,10,15,20-tetrakis(3-pyridyl)porphyrinato) tin(IV) in  $\text{CDCl}_3$ .

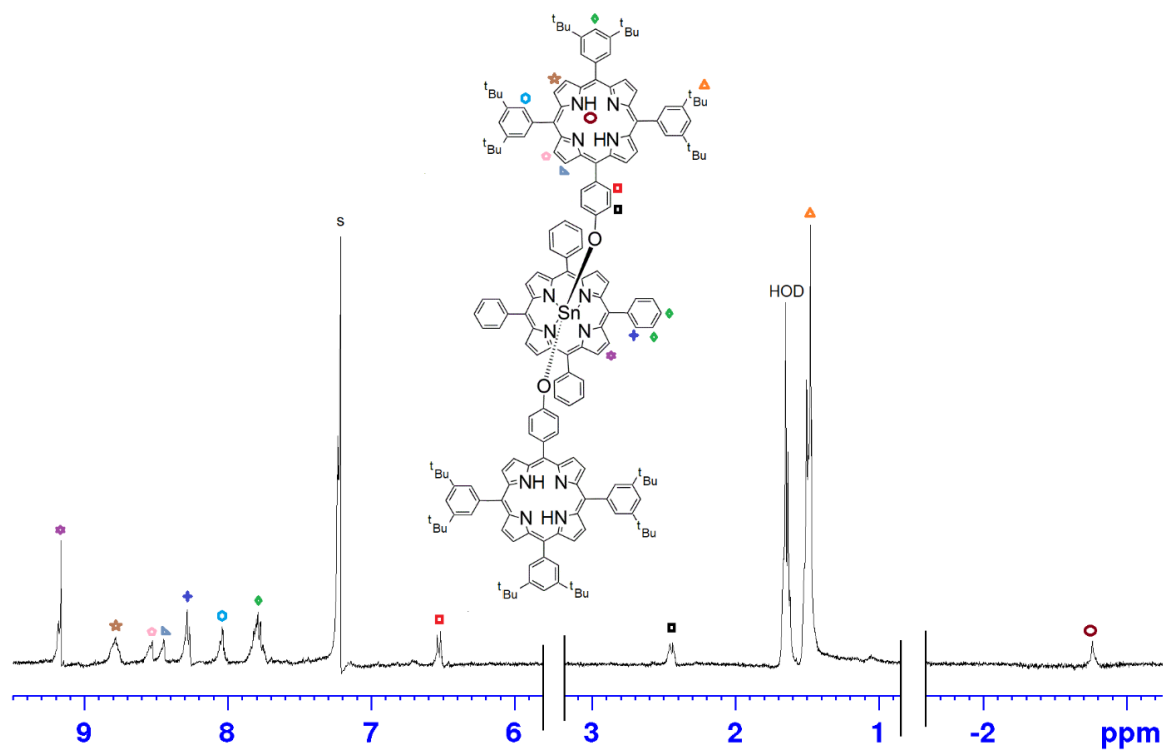

Figure S5.  $^1\text{H}$  NMR spectrum of triad 1 in  $\text{CDCl}_3$ .

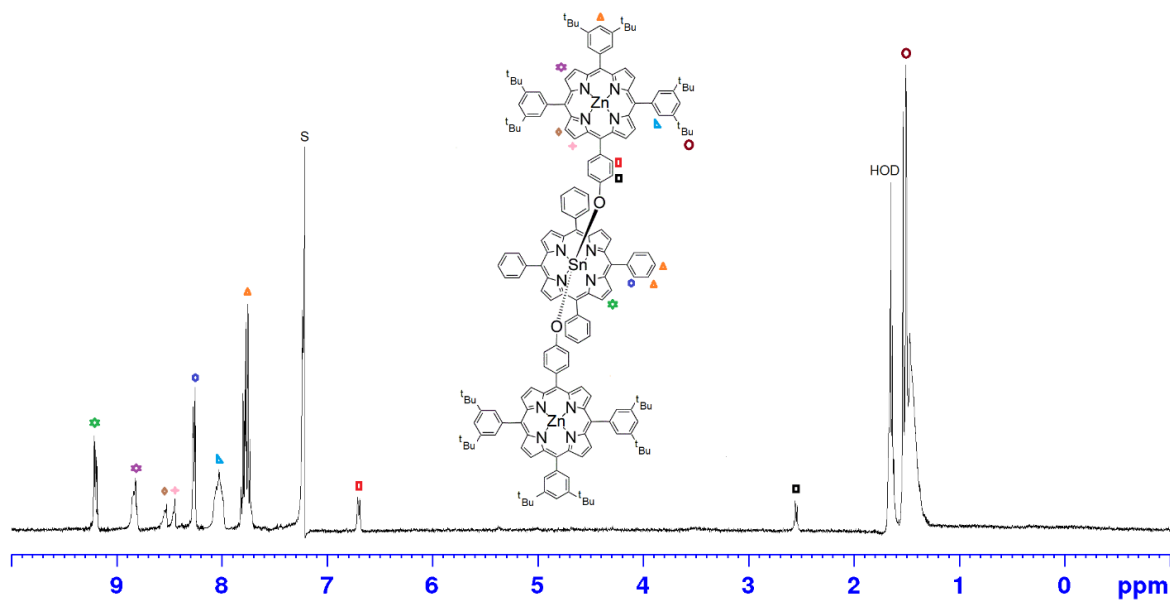

Figure S6.  $^1\text{H}$  NMR spectrum of triad 2 in  $\text{CDCl}_3$ .

The  $^1\text{H}$  NMR spectrum (400 MHz,  $\text{CDCl}_3$ ) of the Zn-Sn complex is displayed. The chemical structure of the complex is shown, with atoms labeled a, b, and c. The spectrum features several peaks corresponding to the complex's protons, with a small inset showing the pyridine ring structure and its labeling.

**Figure S8.**  $^1\text{H}$  NMR spectrum of triad **4** (2 mM) in  $\text{CDCl}_3$  after adding 2 eq. pyridine- $d_5$  (as the solubility of triad **4** in  $\text{CDCl}_3$  is very low). In the presence of bases such as pyridine, triad **4** becomes much soluble in  $\text{CDCl}_3$ . Residual solvent peaks of pyridine coordinated with Zn porphyrin were assigned as a, b, and c respectively.

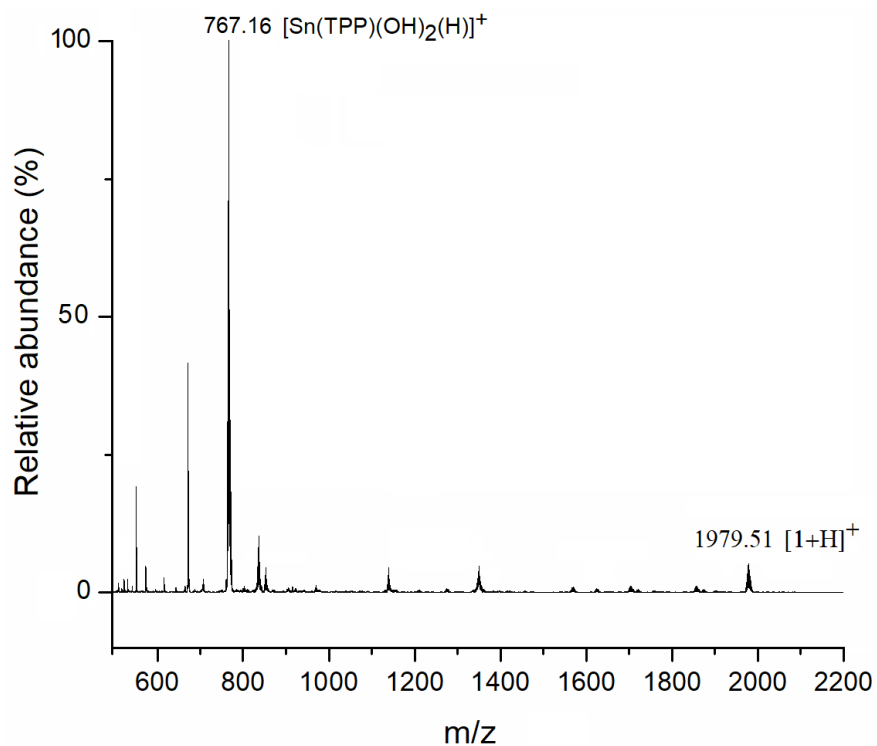

Figure S9. ESI-MS spectrum of triad 1.

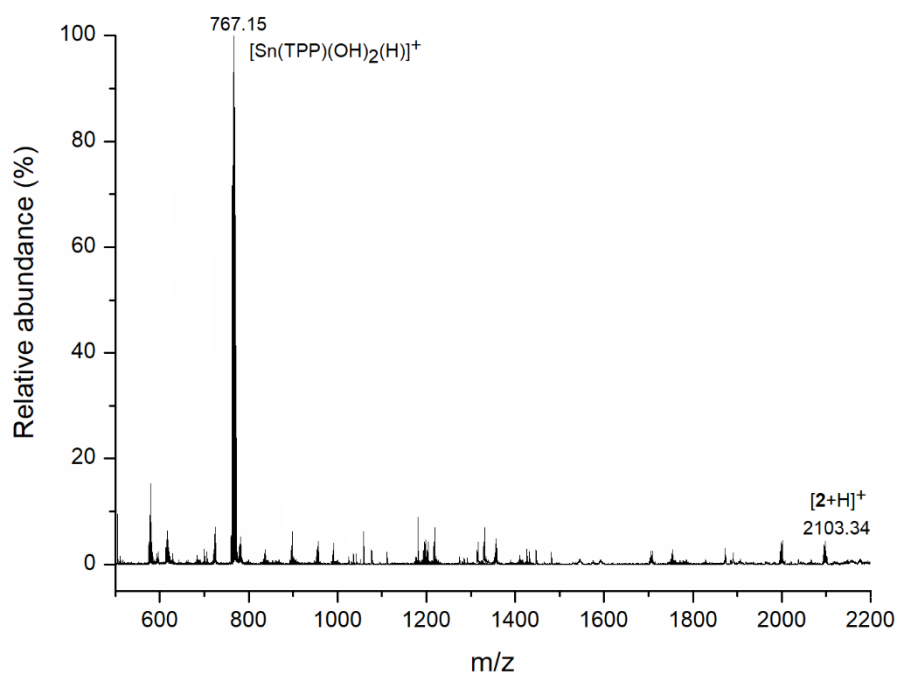

Figure S10. ESI-MS spectrum of triad 2.

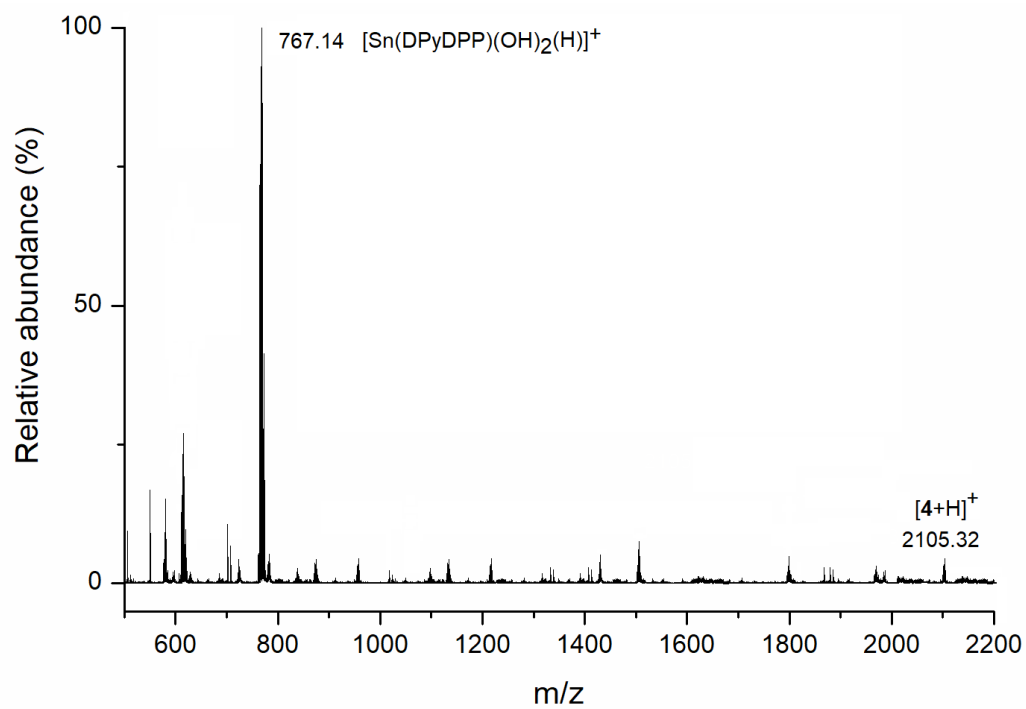

Figure S11. ESI-MS spectrum of triad 3.

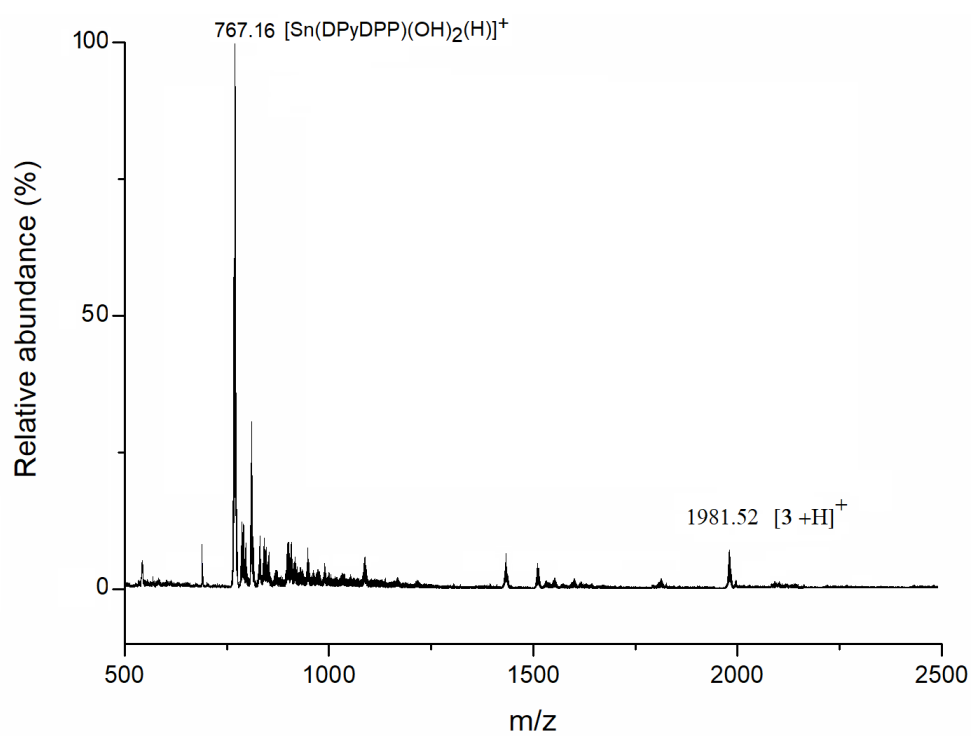

Figure S12. ESI-MS spectrum of triad 4.



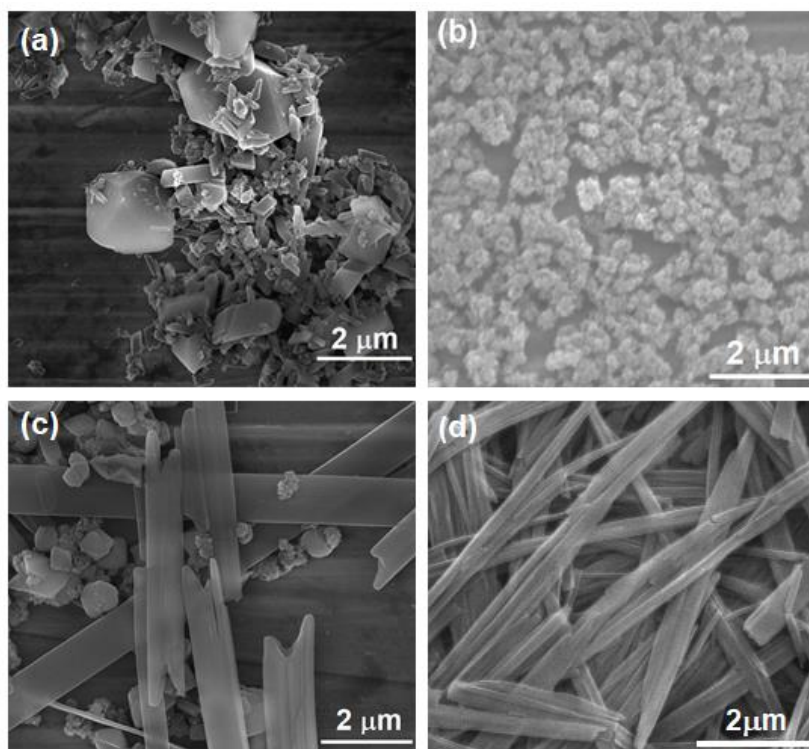

**Figure S13.** SEM images for the aggregates of triads: (a) 1; (b) 2; (c) 3; (d) 4.

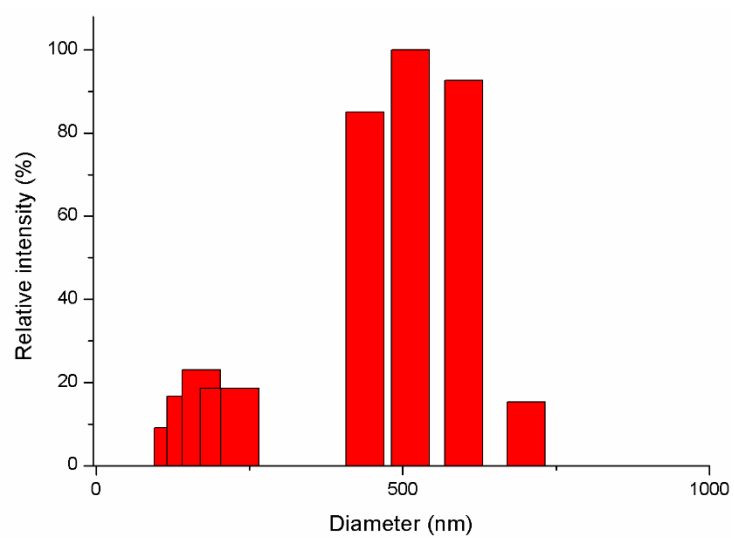

**Figure S14.** Particle analyzing data for triad 2 in a *n*-hexane solution.

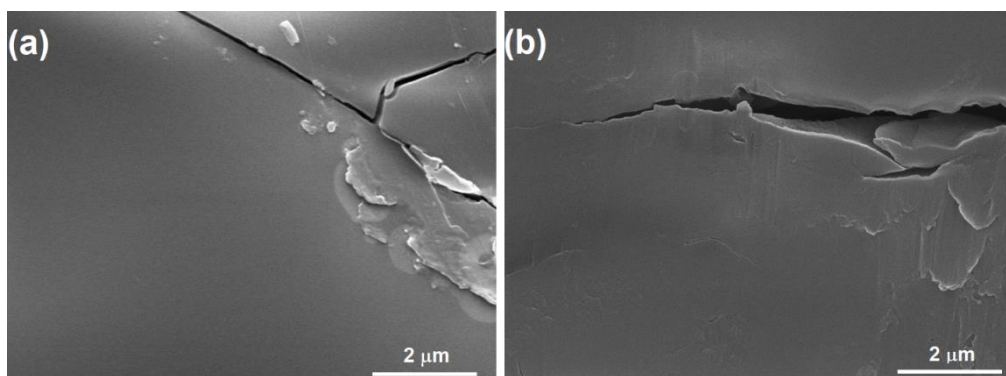

**Figure S15.** SEM images for the aggregates of the monomers: (a) ZnL<sup>1</sup>; (b) SnL<sup>2</sup>.

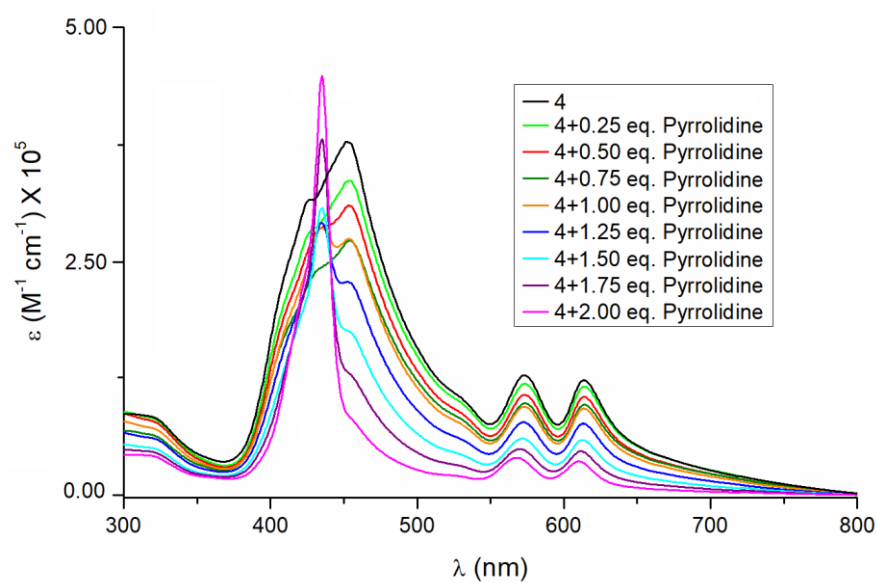

**Figure S16.** Absorption spectral changes of triad 4 upon the addition of pyrrolidine in CHCl<sub>3</sub>.

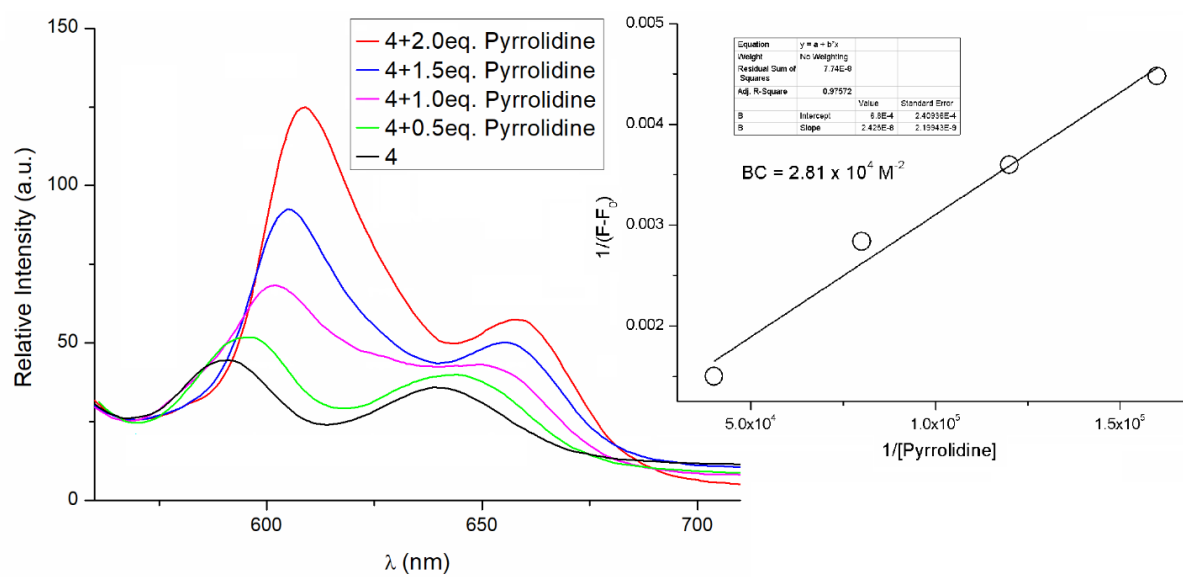

**Figure S17.** Fluorescence intensity changes of triad **4** upon the addition of pyrrolidine in  $\text{CHCl}_3$ .

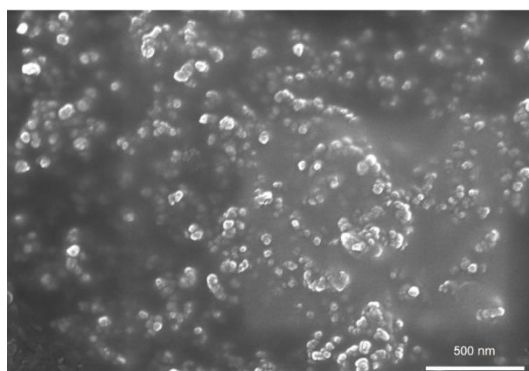

**Figure S18.** SEM image for the aggregates of triad **4** upon the addition of pyrrolidine.

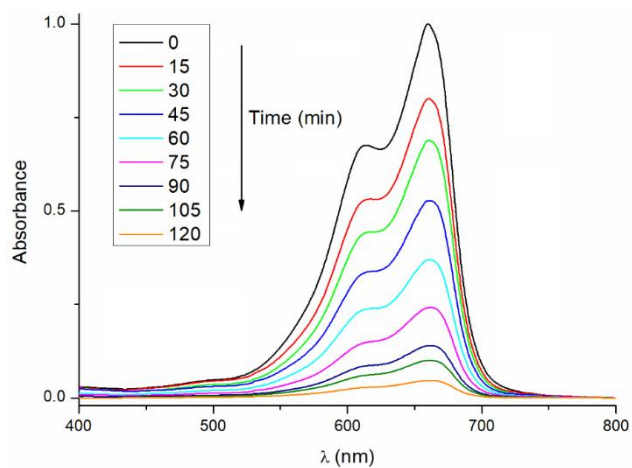

**Figure S19.** Absorption spectra of MB in presence of nano fibers derived from triad 4 under visible light irradiation.

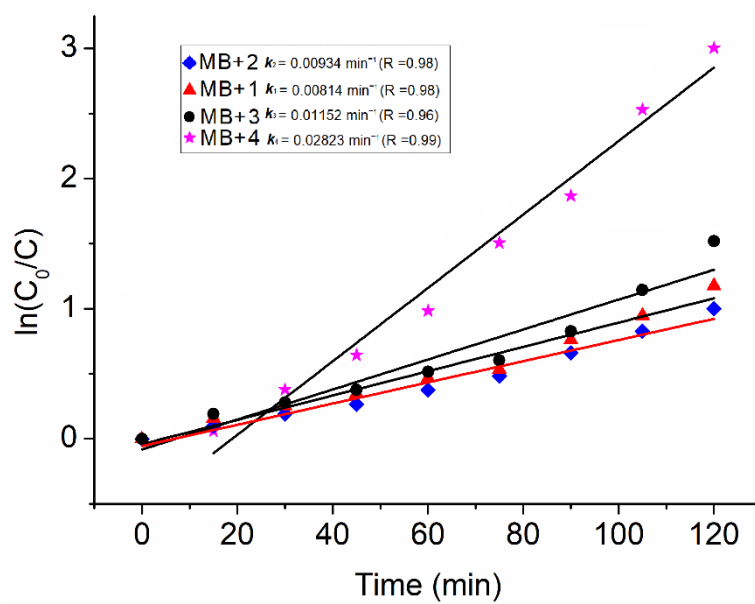

**Figure S20.** Kinetics for the photocatalytic degradation of MB under visible light irradiation of the four triads (1, 2, 3, and 4).

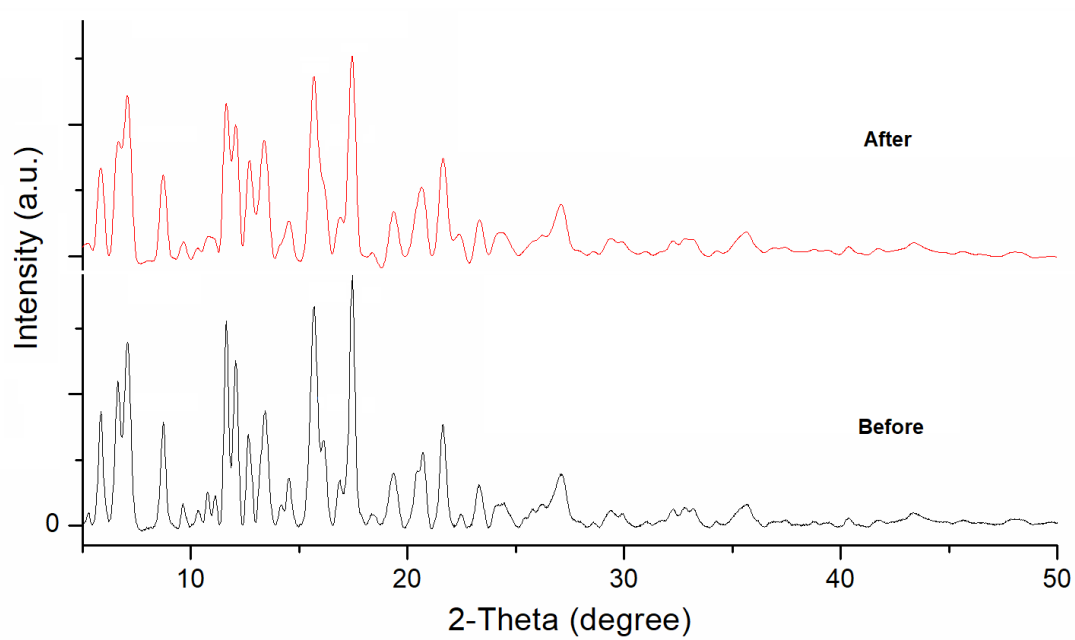

**Figure S21.** PXRD data of triad **4** before and after an experiment on the photo-degradation of MB.

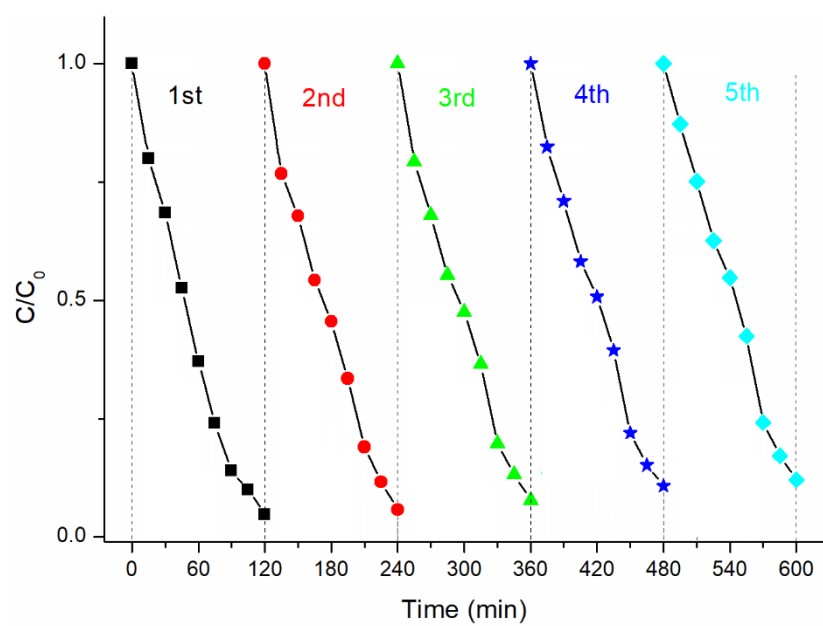

**Figure S22.** Catalytic cycles using triad **4** as a photocatalyst for the degradation of MB.
